# Supplementary material for: First Detection of Microcystin-LR in the Amazon River at the Drinking Water Treatment Plant of the Municipality of Macapá, Brazil
Source: PubMed Central journal article supplement (PMC6891726; doi:10.3390/toxins11110669), 2019-11-15
Supplement: toxins-11-00669-s001.pdf [file toxins-11-00669-s001.pdf]

## Supplementary Materials: First Detection of Microcystin-LR in the Amazon River at the Drinking Water Treatment Plant of the Municipality of Macapá, Brazil

Elane D. C. Oliveira, Raquel Castelo-Branco, Luís Silva, Natalina Silva, Joana Azevedo, Vitor Vasconcelos, Silvia Faustino and Alan Cunha

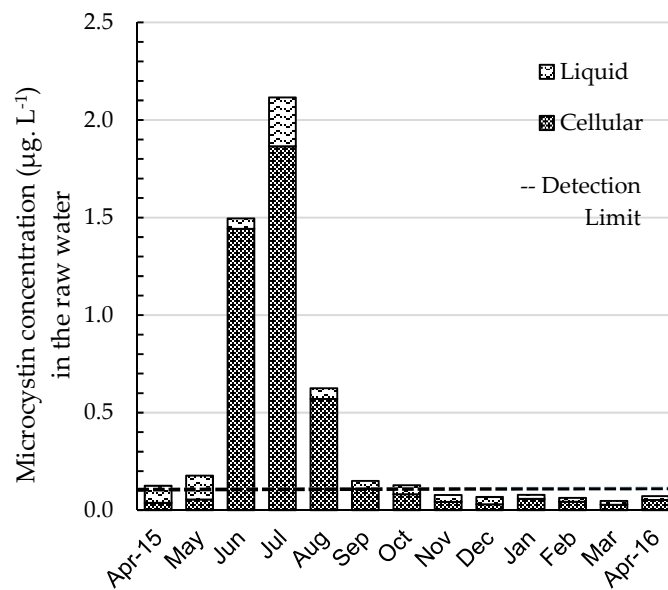

**Figure S1.** Intracellular and extracellular fractions of microcystin from raw and treated water of the DWTP of Macapá.

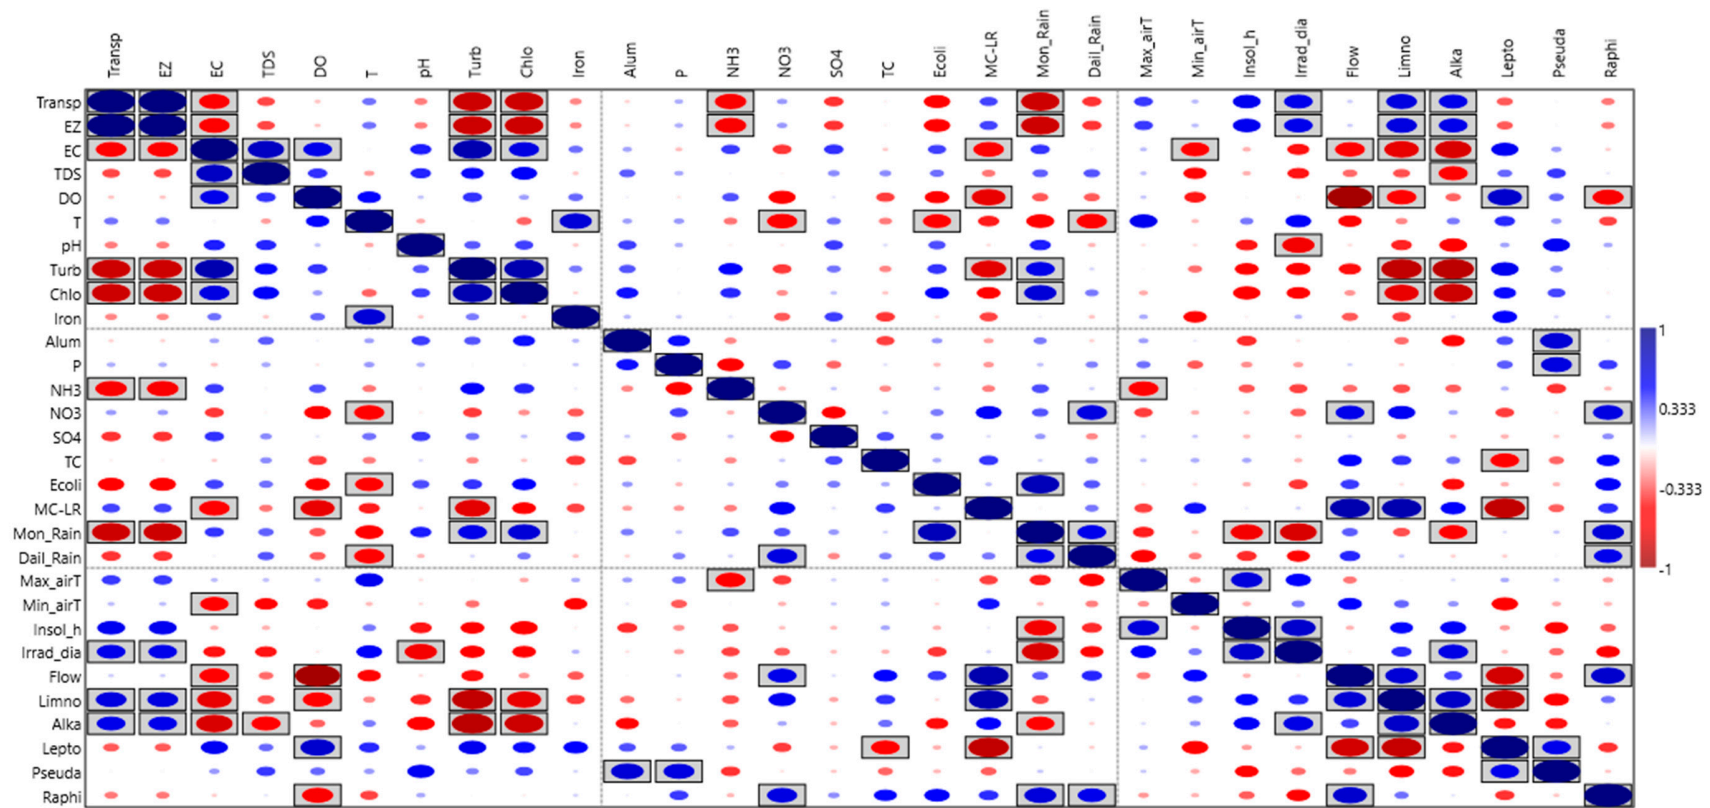

**Figure S2.** Spearman correlation matrix with all environmental variables from the study (described in Table 1). Red = negative correlation; blue = positive correlation; squares indicate  $p < 0.05$ . Legend: Transp- Transparency; EZ- Euphotic Zone; EC- Electrical Conductivity; TDS- Total Dissolved Solids; DO- Dissolved Oxygen; T- Water Temperature; pH; Turb- Turbidity; Chlo- Chloride; Iron; Alum- Aluminum; P- Orthophosphate; NH<sub>3</sub>- Ammonia; NO<sub>3</sub>- Nitrate; SO<sub>4</sub>- Sulfate; TC-Total Coliforms; Ecoli- *E.coli*; MC-LR- Microcystin- LR; Mon\_Rain-Monthly Rain Precipitation; Dail\_Rain-Daily Rain Precipitation; Max\_airT- Maximum Air Temperature; Min\_airT- Minimum Air Temperature; Insol- Insolation; Irrad- Irradiation; Flow; Limno-*Limnothrix*; Alka- *Alkalinema*; Lepto- *Leptolyngbya*; Pseuda- *Pseudanabaena*; Raphi- *Raphidiopsis*.
